# Supplementary material for: Unexpected Heterogeneity of Newly Diagnosed Multiple Myeloma Patients with Plasmacytomas
Source: MDPI journal article supplement (doi:10.3390/biomedicines10102535), 2022-10-11
Supplement: s1 [file s1]

**Supplementary Table S1:** Descriptive characteristics of patients` groups at NDMM diagnosis

| Characteristics <sup>1</sup>          | NDMM<br>reference<br>(N=2440) | NDMM with PS<br>plasmacytomas<br>(N=523) | NDMM with EMD<br>plasmacytomas<br>(N=196) | p-value <sup>2</sup> |
|---------------------------------------|-------------------------------|------------------------------------------|-------------------------------------------|----------------------|
| <b>Sex</b>                            | n=2440                        | n=523                                    | n=196                                     |                      |
| Women                                 | 1148 (47.0%)                  | 210 (40.2%)                              | 76 (38.8%)                                | <b>0.002</b>         |
| Men                                   | 1292 (53.0%)                  | 313 (59.8%)                              | 120 (61.2%)                               |                      |
| <b>Age at tr. initiation (years)</b>  | n=2440                        | n=523                                    | n=196                                     |                      |
| ≤ 65                                  | 1063 (43.6%)                  | 271 (51.8%)                              | 93 (47.4%)                                | <b>0.013</b>         |
| 66–75                                 | 974 (39.9%)                   | 173 (33.1%)                              | 72 (36.7%)                                |                      |
| >75                                   | 403 (16.5%)                   | 79 (15.1%)                               | 31 (15.8%)                                |                      |
| <b>ECOG PS</b>                        | n=2431                        | n=521                                    | n=196                                     |                      |
| 0–1                                   | 1656 (68.1%)                  | 315 (60.5%)                              | 114 (58.2%)                               | <b>&lt;0.001</b>     |
| 2                                     | 516 (21.2%)                   | 134 (25.7%)                              | 47 (24.0%)                                |                      |
| 3–4                                   | 259 (10.7%)                   | 72 (13.8%)                               | 35 (17.9%)                                |                      |
| <b>ISS</b>                            | n=2398                        | n=518                                    | n=194                                     |                      |
| Stage 1                               | 682 (28.4%)                   | 213 (41.1%)                              | 79 (40.7%)                                | <b>&lt;0.001</b>     |
| Stage 2                               | 789 (32.9%)                   | 163 (31.5%)                              | 54 (27.8%)                                |                      |
| Stage 3                               | 927 (38.7%)                   | 142 (27.4%)                              | 61 (31.4%)                                |                      |
| <b>R-ISS</b>                          | n=1007                        | n=205                                    | n=87                                      |                      |
| Stage 1                               | 128 (12.7%)                   | 39 (19.0%)                               | 20 (23.0%)                                | <b>0.001</b>         |
| Stage 2                               | 444 (44.1%)                   | 102 (49.8%)                              | 33 (37.9%)                                |                      |
| Stage 3                               | 435 (43.2%)                   | 64 (31.2%)                               | 34 (39.1%)                                |                      |
| <b>M-protein type</b>                 | n=2438                        | n=522                                    | n=196                                     |                      |
| IgG                                   | 1426 (58.5%)                  | 279 (53.4%)                              | 116 (59.2%)                               | 0.147                |
| IgA                                   | 514 (21.1%)                   | 115 (22.0%)                              | 35 (17.9%)                                |                      |
| LC only                               | 395 (16.2%)                   | 106 (20.3%)                              | 32 (16.3%)                                |                      |
| Non-secretory                         | 36 (1.5%)                     | 8 (1.5%)                                 | 7 (3.6%)                                  |                      |
| other                                 | 67 (2.7%)                     | 14 (2.7%)                                | 6 (3.1%)                                  |                      |
| <b>Serum M-protein level (g/dL)</b>   | n=2431                        | n=520                                    | n=196                                     |                      |
| ≤ 2                                   | 1011 (41.6%)                  | 276 (53.1%)                              | 100 (51.0%)                               | <b>&lt;0.001</b>     |
| > 2                                   | 1420 (58.4%)                  | 244 (46.9%)                              | 96 (49.0%)                                |                      |
| <b>BMPCs %</b>                        | n=2360                        | n=511                                    | n=187                                     |                      |
| <10%                                  | 525 (22.2%)                   | 224 (43.8%)                              | 89 (47.6%)                                | <b>&lt;0.001</b>     |
| ≥10%                                  | 1835 (77.8%)                  | 287 (56.2%)                              | 98 (52.4%)                                |                      |
| <b>Clonal PC (%) - flow cytometry</b> | n=1081                        | n=264                                    | n=111                                     |                      |
| <95%                                  | 209 (19.3%)                   | 85 (32.2%)                               | 43 (38.7%)                                | <b>&lt;0.001</b>     |
| ≥95%                                  | 872 (80.7%)                   | 179 (67.8%)                              | 68 (61.3%)                                |                      |
| <b>LDH (IU/L)</b>                     | n=2374                        | n=515                                    | n=196                                     |                      |
| ≤ 210                                 | 1541 (64.9%)                  | 317 (61.6%)                              | 126 (64.3%)                               | 0.352                |
| > 210                                 | 833 (35.1%)                   | 198 (38.4%)                              | 70 (35.7%)                                |                      |

|                                     |              |             |             |                  |
|-------------------------------------|--------------|-------------|-------------|------------------|
| <b>Creatinine level (μmol/L)</b>    | n=2436       | n=522       | n=196       |                  |
| ≤ 176                               | 1955 (80.3%) | 457 (87.5%) | 171 (87.2%) | <b>&lt;0.001</b> |
| > 176                               | 481 (19.7%)  | 65 (12.5%)  | 25 (12.8%)  |                  |
| <b>Calcium total level (mmol/L)</b> | n=2435       | n=522       | n=196       |                  |
| ≤ 2.65                              | 2079 (85.4%) | 452 (86.6%) | 167 (85.2%) | 0.763            |
| > 2.65                              | 356 (14.6%)  | 70 (13.4%)  | 29 (14.8%)  |                  |
| <b>Hemoglobin level (g/dL)</b>      | n=2438       | n=522       | n=196       |                  |
| ≥ 12                                | 673 (27.6%)  | 220 (42.1%) | 86 (43.9%)  | <b>&lt;0.001</b> |
| < 12                                | 1765 (72.4%) | 302 (57.9%) | 110 (56.1%) |                  |
| <b>Thrombocyte count (10E9/L)</b>   | n=2437       | n=522       | n=196       |                  |
| ≥ 175                               | 1666 (68.4%) | 417 (79.9%) | 158 (80.6%) | <b>&lt;0.001</b> |
| < 175                               | 771 (31.6%)  | 105 (20.1%) | 38 (19.4%)  |                  |
| <b>IGH disruption</b>               | n=1315       | n=268       | n=107       |                  |
| negative                            | 736 (56.0%)  | 160 (59.7%) | 68 (63.6%)  | 0.203            |
| positive                            | 579 (44.0%)  | 108 (40.3%) | 39 (36.4%)  |                  |
| <b>t(11;14)</b>                     | n=1119       | n=231       | n=87        |                  |
| negative                            | 951 (85.0%)  | 199 (86.1%) | 80 (92.0%)  | 0.196            |
| positive                            | 168 (15.0%)  | 32 (13.9%)  | 7 (8.0%)    |                  |
| <b>t(4;14)</b>                      | n=1194       | n=244       | n=105       |                  |
| negative                            | 1035 (86.7%) | 221 (90.6%) | 93 (88.6%)  | 0.239            |
| positive                            | 159 (13.3%)  | 23 (9.4%)   | 12 (11.4%)  |                  |
| <b>del(13)(q14)/monosomy 13</b>     | n=1332       | n=268       | n=107       |                  |
| negative                            | 705 (52.9%)  | 143 (53.4%) | 65 (60.7%)  | 0.301            |
| positive                            | 627 (47.1%)  | 125 (46.6%) | 42 (39.3%)  |                  |
| <b>gain(1q21)</b>                   | n=1310       | n=262       | n=107       |                  |
| negative                            | 762 (58.2%)  | 164 (62.6%) | 59 (55.1%)  | 0.306            |
| positive                            | 548 (41.8%)  | 98 (37.4%)  | 48 (44.9%)  |                  |
| <b>del(17p13)</b>                   | n=1235       | n=246       | n=102       |                  |
| negative                            | 1070 (86.6%) | 216 (87.8%) | 84 (82.4%)  | 0.388            |
| positive                            | 165 (13.4%)  | 30 (12.2%)  | 18 (17.6%)  |                  |
| <b>Hyperdiploidy</b>                | n=1115       | n=212       | n=76        |                  |
| negative                            | 615 (55.2%)  | 124 (58.5%) | 35 (46.1%)  | 0.179            |
| positive                            | 500 (44.8%)  | 88 (41.5%)  | 41 (53.9%)  |                  |

<sup>1</sup> described by absolute and relative frequencies for categorical variables and median (5th–95th percentile) for continuous variables

<sup>2</sup> p-value of Fisher's exact test for categorical variables or Kruskal-Wallis test for continuous variables

**Supplementary Table S2:** Treatment in 1st line of therapy

| Characteristics <sup>1</sup>      | NDMM reference<br>(N=2440) | NDMM with PS<br>plasmacytoma<br>(N=523) | NDMM with EMD<br>plasmacytoma<br>(N=196) | p-value <sup>2</sup> |
|-----------------------------------|----------------------------|-----------------------------------------|------------------------------------------|----------------------|
| <b>Proteasome inhibitors</b>      | n=2440                     | n=523                                   | n=196                                    |                      |
| no                                | 568 (23.3%)                | 91 (17.4%)                              | 30 (15.3%)                               | <b>0.001</b>         |
| yes                               | 1872 (76.7%)               | 432 (82.6%)                             | 166 (84.7%)                              |                      |
| <b>Immunomodulatory drugs</b>     | n=2440                     | n=523                                   | n=196                                    |                      |
| no                                | 1033 (42.3%)               | 224 (42.8%)                             | 88 (44.9%)                               | 0.772                |
| yes                               | 1407 (57.7%)               | 299 (57.2%)                             | 108 (55.1%)                              |                      |
| <b>Monoclonal antibodies</b>      | n=2440                     | n=523                                   | n=196                                    |                      |
| no                                | 2382 (97.6%)               | 509 (97.3%)                             | 192 (98.0%)                              | 0.865                |
| yes                               | 58 (2.4%)                  | 14 (2.7%)                               | 4 (2.0%)                                 |                      |
| <b>Regimen</b>                    | n=2440                     | n=523                                   | n=196                                    |                      |
| PI+dex+/- alkylator               | 1016 (41.6%)               | 220 (42.1%)                             | 86 (43.9%)                               | <b>0.022</b>         |
| PI+IMiD+dex                       | 798 (32.7%)                | 198 (37.9%)                             | 76 (38.8%)                               |                      |
| IMiD+dex                          | 568 (23.3%)                | 91 (17.4%)                              | 30 (15.3%)                               |                      |
| PI+IMiD+MA+dex                    | 41 (1.7%)                  | 10 (1.9%)                               | 2 (1.0%)                                 |                      |
| PI+MA+dex                         | 17 (0.7%)                  | 4 (0.8%)                                | 2 (1.0%)                                 |                      |
| <b>Radiotherapy</b>               | n=2440                     | n=523                                   | n=196                                    |                      |
| no                                | 2288 (93.8%)               | 357 (68.3%)                             | 127 (64.8%)                              | <b>&lt;0.001</b>     |
| yes                               | 152 (6.2%)                 | 166 (31.7%)                             | 69 (35.2%)                               |                      |
| <b>ASCT</b>                       | n=2440                     | n=523                                   | n=196                                    |                      |
| no                                | 1561 (64.0%)               | 337 (64.4%)                             | 130 (66.3%)                              | 0.806                |
| yes                               | 879 (36.0%)                | 186 (35.6%)                             | 66 (33.7%)                               |                      |
| <b>Best response to treatment</b> | n=2098                     | n=424                                   | n=156                                    |                      |
| sCR/CR                            | 380 (18.1%)                | 90 (21.2%)                              | 24 (15.4%)                               | 0.059                |
| VGPR                              | 786 (37.5%)                | 178 (42.0%)                             | 67 (42.9%)                               |                      |
| PR                                | 663 (31.6%)                | 110 (25.9%)                             | 46 (29.5%)                               |                      |
| MR                                | 130 (6.2%)                 | 26 (6.1%)                               | 8 (5.1%)                                 |                      |
| SD                                | 88 (4.2%)                  | 8 (1.9%)                                | 4 (2.6%)                                 |                      |
| PD                                | 51 (2.4%)                  | 12 (2.8%)                               | 7 (4.5%)                                 |                      |

<sup>1</sup> described by absolute and relative frequencies for categorical variables

<sup>2</sup> p-value of Fisher's exact test for categorical variables or Kruskal-Wallis test for continuous variables  
Abbreviations: PI (Proteasome inhibitors), IMiD (Immunomodulatory Drugs), MA (Monoclonal Antibodies), dex (dexamethasone or equivalent corticosteroids), ASCT (Autologous Stem Cell Transplant), sCR/CR (stringent Complete Response/Complete Response), VGPR (Very Good Partial Response), PR (Partial Response), MR (Minor Response), SD (Stable Disease), PD (Progressive Disease)
